# Supplementary material
Source: MDPI journal article supplement (https://www.mdpi.com/2077-1312/7/11/390)

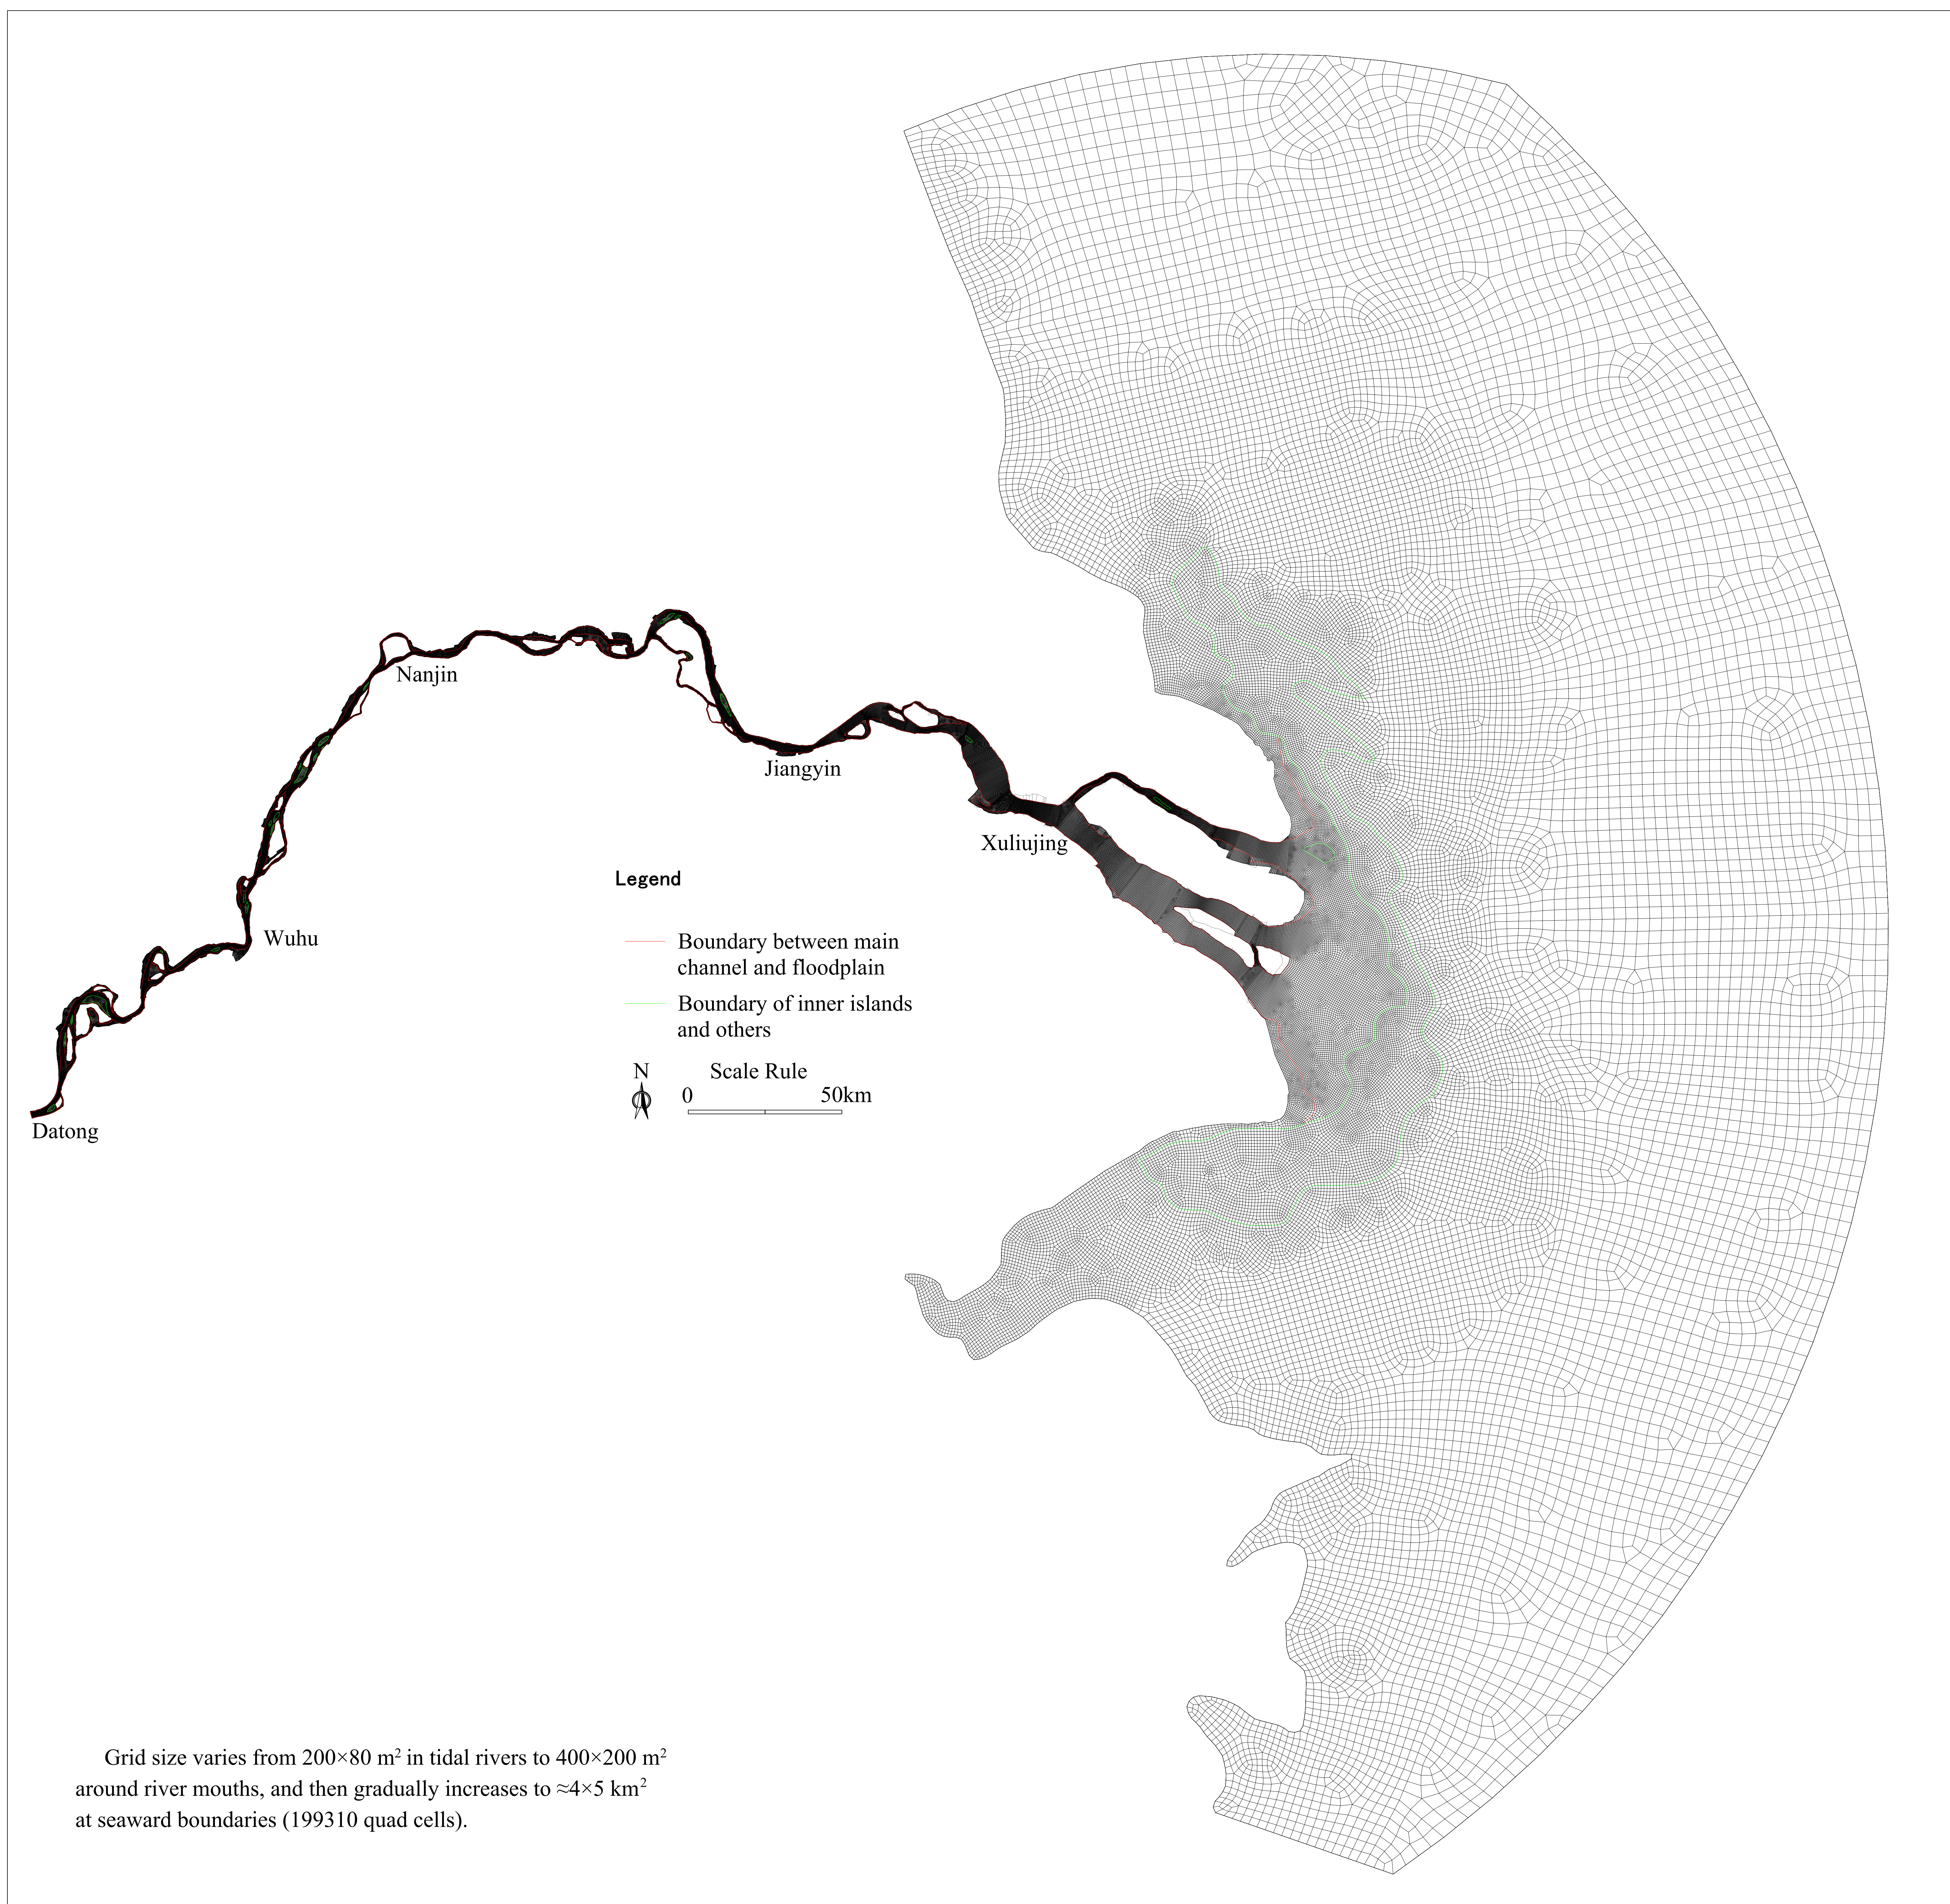

Figure S1. Channel-refined computational grid for numerical model of Yangtze Estuary

Supplement: s1 [file s1]
